# Supplementary material for: The effects of B‐cell–activating factor on the population size, maturation and function of murine natural killer cells
Source: PubMed Central journal article supplement (PMC9828838; doi:10.1111/imcb.12585), 2022-10-08
Supplement: IMCB-100-761-s001.pdf [file IMCB-100-761-s001.pdf]

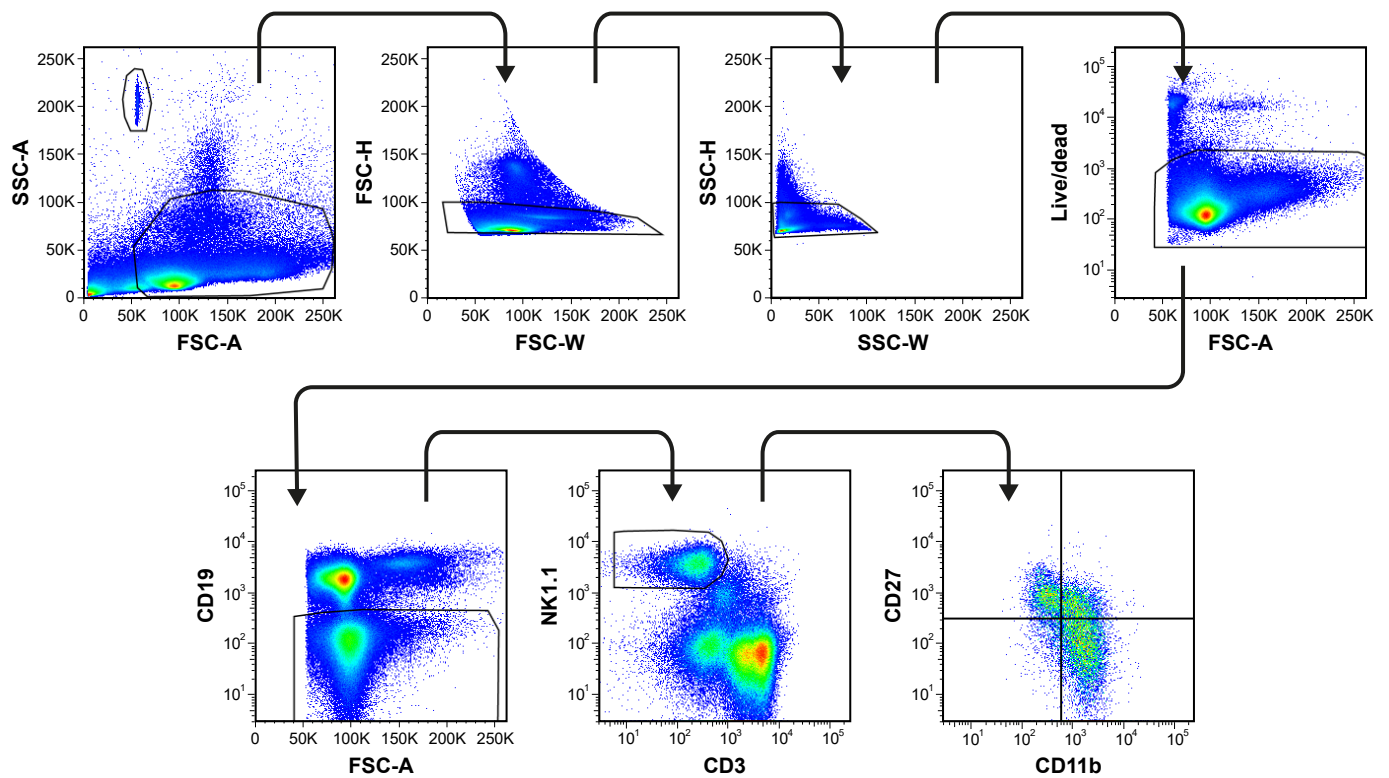

**Supplementary figure 1.** Gating strategy used to identify NK cells in mouse spleens. Single lymphocytic cells were initially identified based on their characteristic forward scatter (FSC) and side scatter (SSC) properties. Zombie™ Aqua Fixable Viability Kit was used to exclude dead cells. Cells within the CD19<sup>-</sup> gate were identified to exclude lineage cells. NK cells were identified as the CD3<sup>-</sup> NK1.1<sup>+</sup> population, which was then divided into distinct maturation stages based on the expression of CD11b and CD27.

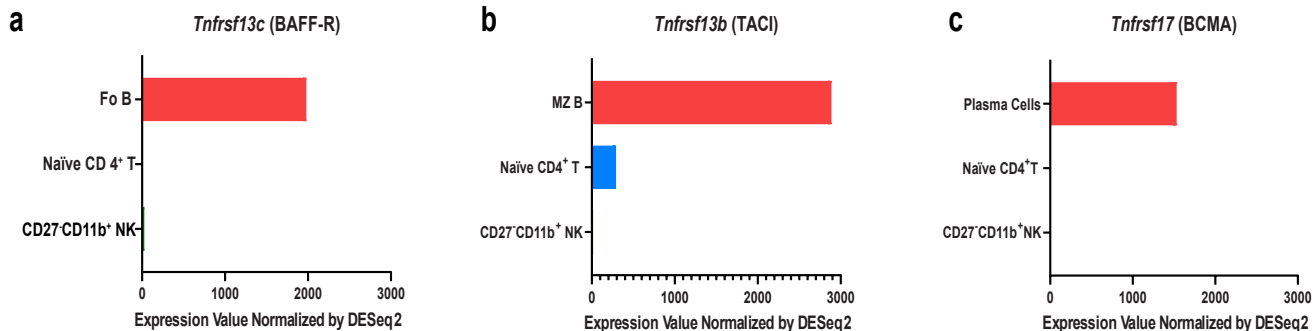

**Supplementary figure 2.** RNA sequencing (RNAseq) analysis of **(a)** *Tnfrsf13c* (BAFF-R), **(b)** *Tnfrsf13b* (TACI) and **(c)** *Tnfrsf17* (BCMA) in splenic CD27<sup>-</sup>CD11b<sup>+</sup> NK cells, naïve T cells and B cells from 6 weeks old C57BL/6J mice ( $n = 1-3$ ). B cells consists of follicular (Fo) B cells, marginal zone (MZ) B cells and plasma cells. The gene expression values are derived from the Immunological Genome Project (ImmGen) database. Cell types are colour-coded: B cells (red), naïve T cells (blue) and natural killer (NK) cells (green).

**Supplementary table 1.** Genetically-modified mice of the BAFF system

| <b>Genotype</b>       | <b>Phenotype</b>                                      | <b>Genetic modification<sup>†</sup></b>                                                                                                                                                                           | <b>Reference</b>                                                                                                                                                                                                          |
|-----------------------|-------------------------------------------------------|-------------------------------------------------------------------------------------------------------------------------------------------------------------------------------------------------------------------|---------------------------------------------------------------------------------------------------------------------------------------------------------------------------------------------------------------------------|
| BAFF <sup>-/-</sup>   | Mice exhibit impaired B cell survival and maturation. | Exons 1 and 2 (732 bp) that include the first 134 residues of the coding sequence were replaced with a human CD2 reporter gene fused to a neomycin-resistance cassette                                            | Schiemann, B, Gommerman, JL, Vora, K, <i>et al.</i> An essential role for BAFF in the normal development of B cells through a BCMA-independent pathway. <i>Science</i> . 2001; <b>293</b> : 2111-2114.                    |
| BAFF-R <sup>-/-</sup> | Mice exhibit impaired B cell survival and maturation. | Cre-recombinase-mediated excision of a floxed region containing exons 3 and 4. The excised region encoded the entire extracellular and transmembrane domains and part of the cytoplasmic domain of this receptor. | Sasaki, Y, Casola, S, Kutok, J, <i>et al.</i> TNF family member B cell-activating factor (BAFF) receptor-dependent and -independent roles for BAFF in B cell physiology. <i>J Immunol</i> . 2004; <b>173</b> : 2245-2252. |
| TACI <sup>-/-</sup>   | Mice exhibit increased numbers of peripheral          | A tail-less human CD2 reporter cDNA and PGK-                                                                                                                                                                      | Von Bülow GU, Van Deursen JM, Bram RJ. Regulation of the T-independent humoral response by TACI. <i>Immunity</i> 2001; <b>14</b> : 573-582.                                                                               |

|                     |                                                                                                                                  |                                                                                                                                                                                                                                                                                       |                                                                                                                                                                                                        |
|---------------------|----------------------------------------------------------------------------------------------------------------------------------|---------------------------------------------------------------------------------------------------------------------------------------------------------------------------------------------------------------------------------------------------------------------------------------|--------------------------------------------------------------------------------------------------------------------------------------------------------------------------------------------------------|
|                     | B cells, decreased serum IgA levels, and impaired responses to T cell-independent antigens, most notably those that are Type II. | neo cassette replaced 6.12 kb immediately downstream of the start ATG codon. This resulted in the insertion of stop codons in all potential reading frames downstream of the inserted reporter.                                                                                       |                                                                                                                                                                                                        |
| BCMA <sup>-/-</sup> | Mice have reduced number of long-lived bone marrow plasma cells                                                                  | A region of the gene containing the translation initiation codon and 1.3 kb of downstream sequences were replaced with a human CD2 reporter gene fused to a neomycin resistance cassette. The mutation deletes the first 87 residues, which includes a putative transmembrane domain. | Schiemann, B, Gommerman, JL, Vora, K, <i>et al.</i> An essential role for BAFF in the normal development of B cells through a BCMA-independent pathway. <i>Science</i> . 2001; <b>293</b> : 2111-2114. |
| BAFF Tg             | Mice overproduce BAFF and have increased numbers of                                                                              | Full-length murine Tnfsf13b (BAFF) was expressed under the control of the human                                                                                                                                                                                                       | Mackay, F, Woodcock, SA, Lawton, P, Ambrose C, Baetscher M, Schneider P. Mice transgenic for BAFF develop lymphocytic disorders                                                                        |

---

peripheral B cells. liver-specific alpha-1- along with autoimmune manifestations. *J Exp Med.* 1999; **190**: 1697-1710.  
These mice develop antitrypsin promoter with an  
symptoms of an apolipoprotein E enhancer.  
autoimmune disorder  
from approximately 8  
weeks of age.

---

† The information included under genetic modification was extracted from the Mouse Genome Database (MGD) at the Mouse Genome Informatics website, The Jackson Laboratory, Bar Harbor, Maine. World Wide Web (URL: <http://www.informatics.jax.org>).

**Supplementary table 2.** Antibodies used in this experiment.

| Target antigen             | Fluorochrome/conjugate | Clone                | Isotype                                        | Manufacturer    |
|----------------------------|------------------------|----------------------|------------------------------------------------|-----------------|
| BAFF-R                     | PE                     | TH22-<br>E16         | Rat IgG1, $\kappa$                             | Biolegend       |
| CD3                        | APC<br>V450            | 145-<br>2C11<br>17A2 | Armenian<br>Hamster IgG<br>Rat IgG2b, $\kappa$ | Biolegend<br>BD |
| CD11b                      | FITC                   | M1/70                | Rat IgG2b, $\kappa$                            | BD              |
| CD16/32<br>(Fc -<br>block) | -                      | 2.4G2                | Rat IgG2b, $\kappa$                            | BD              |
| CD19                       | PerCP-Cy5.5            | 1D3                  | Rat IgG2a, $\kappa$                            | BD              |
| CD21/35                    | eFluor450              | eBio4E3              | Rat IgG2a, $\lambda$                           | eBioscience     |
| CD23                       | PE-Cy7                 | B3B4                 | Rat IgG2a, $\kappa$                            | eBioscience     |
| CD27                       | PE                     | LG.3A10              | Armenian<br>Hamster IgG1,<br>$\kappa$          | BD              |
| CD44                       | APC                    | IM7                  | Rat IgG2b, $\kappa$                            | eBioscience     |
| CD62L                      | FITC<br>PE             | MEL14<br>MEL14       | Rat IgG2a, $\kappa$<br>Rat IgG2a, $\kappa$     | BD<br>BD        |
| CD93                       | APC                    | AA4.1                | Rat IgG2b, $\kappa$                            | eBioscience     |
| Granzyme B                 | AF647                  | GB11                 | Mouse<br>(BALB/c) IgG1,<br>$\kappa$            | BD              |
| IgM                        | FITC                   | II/41                | Rat IgG2a, $\kappa$                            | BD              |
| NK1.1                      | PE-Cy7                 | PK136                | Mouse (C3H x<br>BALB/c)<br>IgG2a, $\kappa$     | BD              |
| TACI                       | PE                     | 8F10                 | Rat IgG2a                                      | Biolegend       |
| TCR $\beta$                | V450                   | H57-597              | Mouse IgG2, $\lambda$ 1                        | BD              |
